# Supplementary material for: Optimizing electron-rich arylamine derivatives in thiophene-fused derivatives as π bridge-based hole transporting materials for perovskite solar cells
Source: Royal Society of Chemistry journal article supplement (doi:10.1039/c9ra03408k), 2019-01-01
Supplement: c9ra03408k1.pdf [file c9ra03408k1.pdf]

## Supplementary Information

### Optimizing electron-rich arylamine derivatives in thiophene-fused as $\pi$ bridge-based hole transporting materials for perovskite solar cells

Xiaorui Liu\* and Xing Liu

<sup>a</sup>Key Laboratory of Luminescent and Real-Time Analytical Chemistry (Southwest University), Ministry of Education, School of Chemistry and Chemical Engineering, Southwest University, Chongqing 400715, China

#### \*Corresponding Authors

E-mail: [liuxiaorui@swu.edu.cn](mailto:liuxiaorui@swu.edu.cn) (X. Liu)

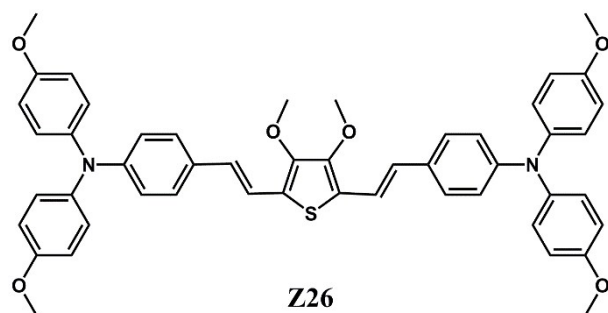

**Fig. S1** Chemical structure of the reported hole transporting material Z26.

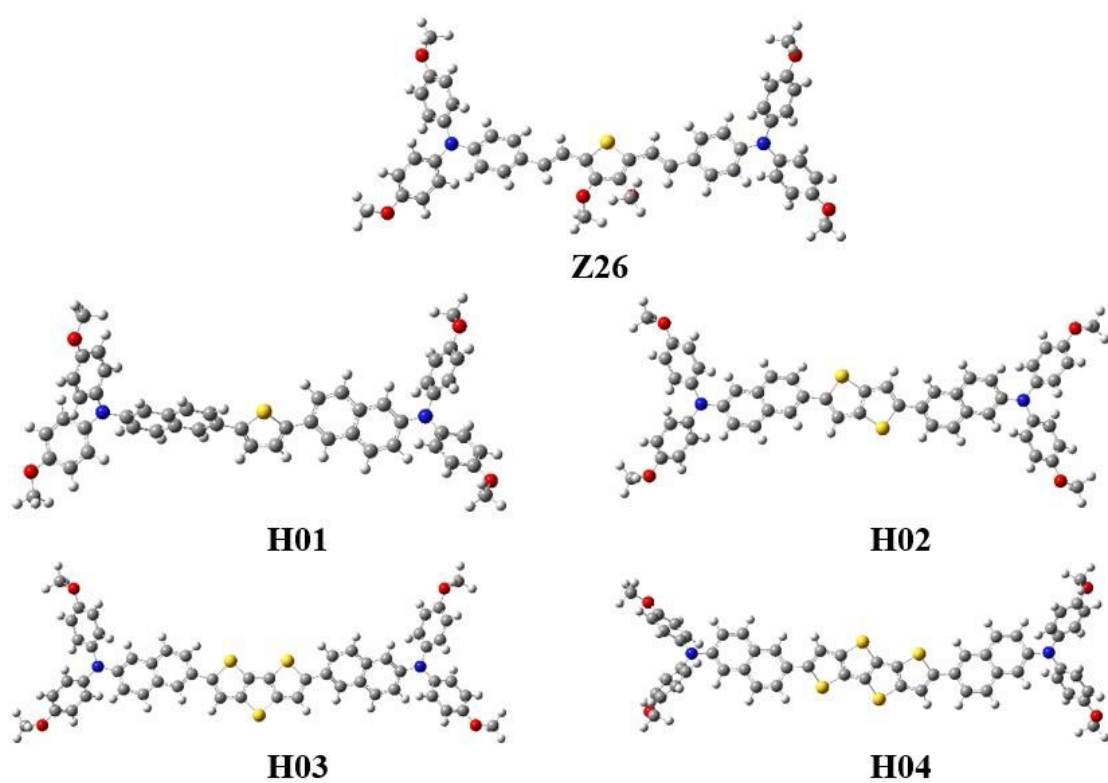

**Fig. S2** Optimized structure for the hole transporting materials from B3P86/6-311G(d,p) calculations.

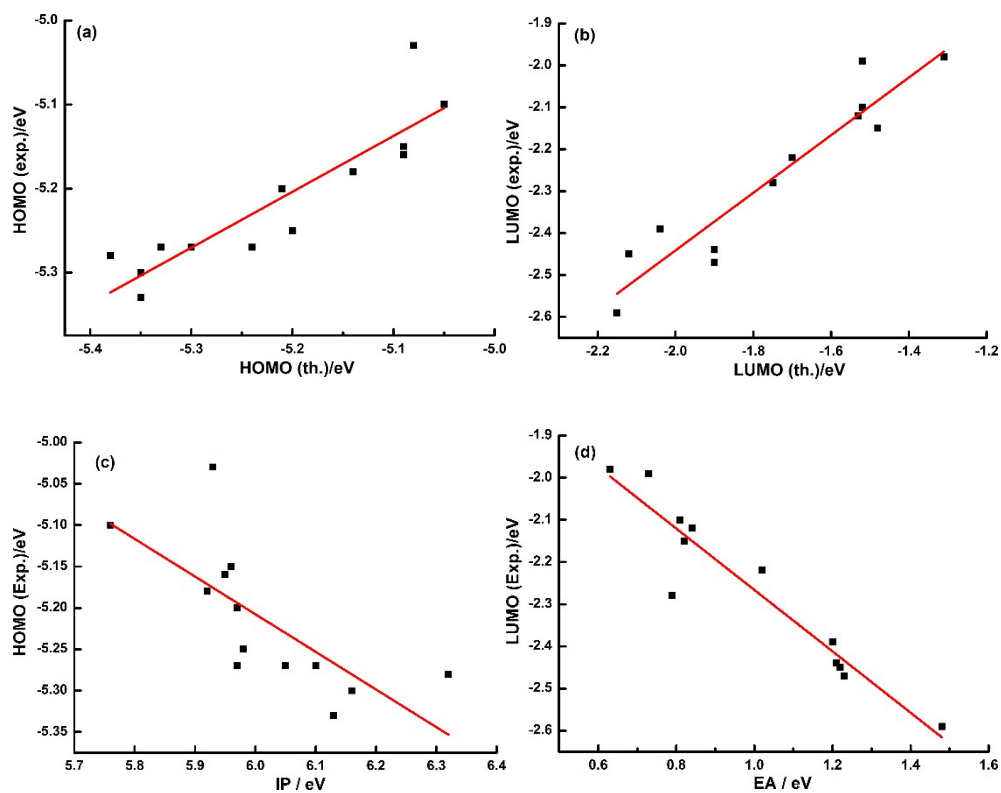

**Fig. S3** Linearity of HOMO and LUMO energy between theoretical calculations and experimental data.

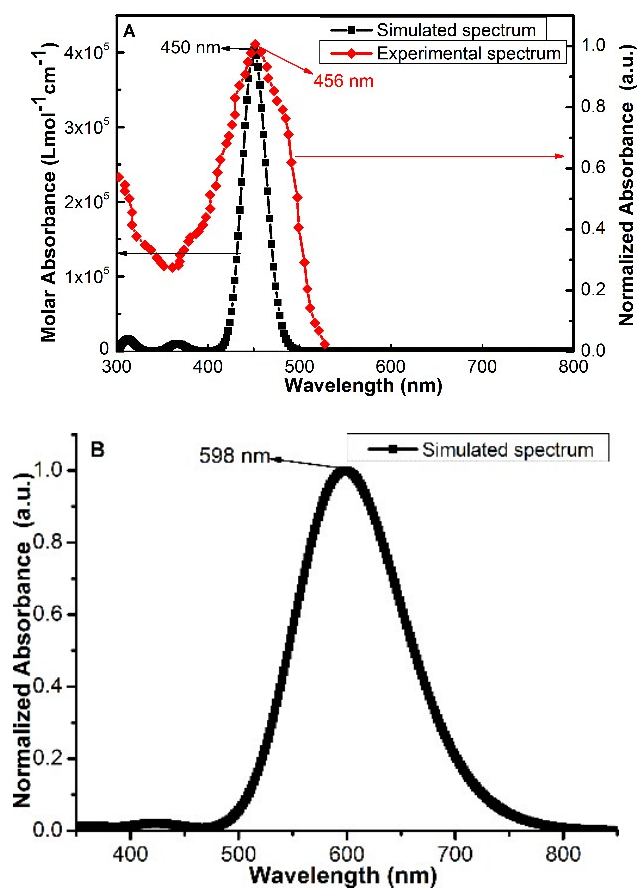

**Fig. S4** Simulated absorption spectra (a) and photoluminescence spectra (b) of H1 using the TD-BMK/6-31g(d) functional and basis set in tetrahydrofuran together with the experimental UV-spectra.

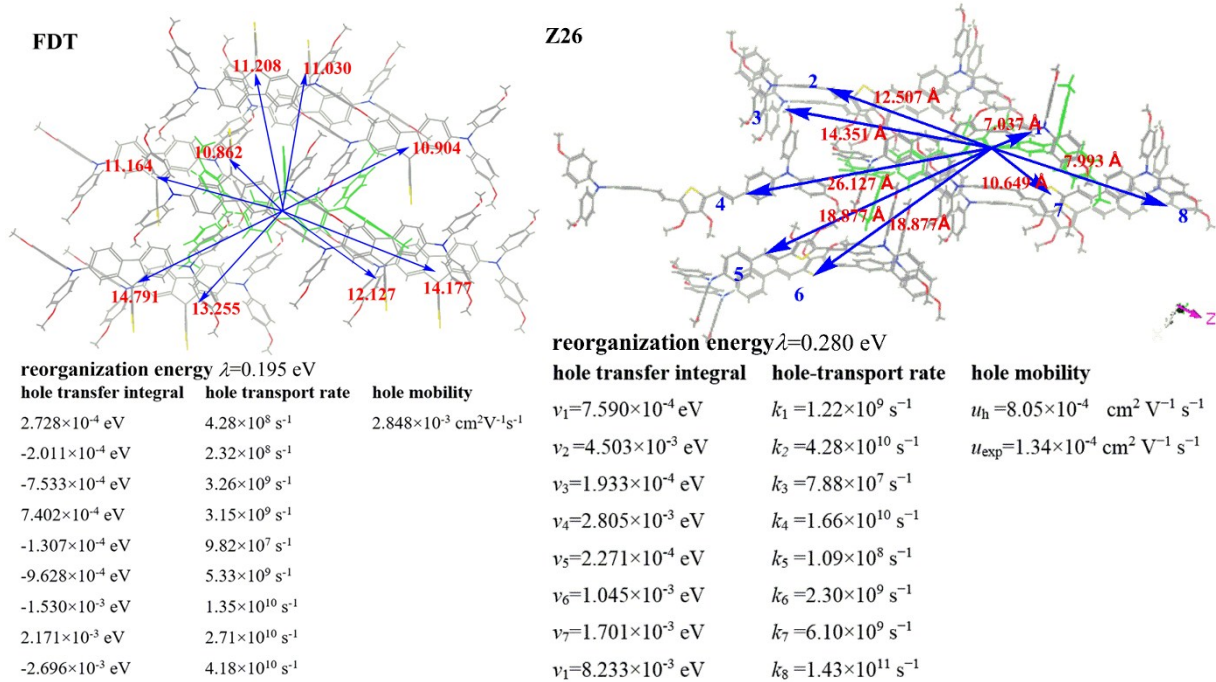

**Fig. S5** Main hole-hopping pathways and computational parameters (center-of-mass distance  $D$  highlighted in red color) on basis of crystal structures for Z26 and FDT. Hole mobility of  $u_{exp}$  come from the reference<sup>1</sup>.

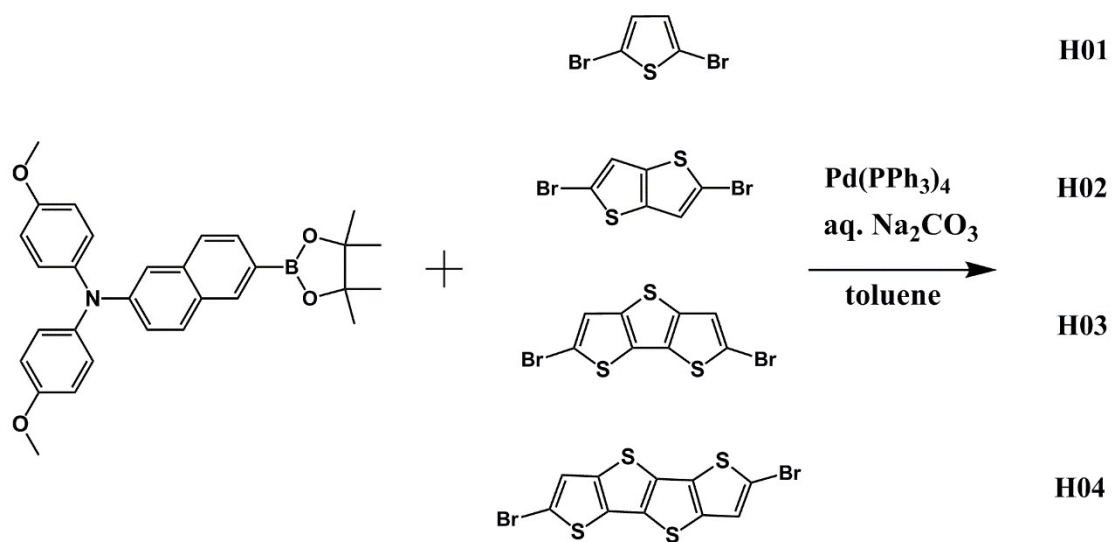

Fig. S6 Recommended synthesis schemes and chemical structures of H01-H04.

**Table S1** HOMO and LUMO energy levels of theoretical calculation and experimental values for HTMs.

|              | IP   | EA   | HOMO (Exp.) | HOMO(Th.) | LUMO (Exp.) | LUMO(Th.) | Ref. |
|--------------|------|------|-------------|-----------|-------------|-----------|------|
| AS37         | 5.93 | 0.73 | -5.03       | -5.08     | -1.99       | -1.52     | 2    |
| BTT-1        | 5.97 | 0.63 | -5.2        | -5.21     | -1.98       | -1.31     | 3    |
| H-Di         | 6.10 | 1.02 | -5.27       | -5.30     | -2.22       | -1.70     | 4    |
| Z25          | 5.92 | 1.21 | -5.18       | -5.14     | -2.44       | -1.90     | 1    |
| FDT          | 5.95 | 0.79 | -5.16       | -5.09     | -2.28       | -1.75     | 5    |
| X59          | 5.96 | 0.81 | -5.15       | -5.09     | -2.10       | -1.52     | 6    |
| H-Tri        | 6.05 | 0.82 | -5.27       | -5.33     | -2.15       | -1.48     | 4    |
| spiro-OMeTAD | 5.76 | 0.84 | -5.1        | -5.05     | -2.12       | -1.53     | 1    |
| Th101        | 5.98 | 1.23 | -5.25       | -5.20     | -2.47       | -1.90     | 7    |
| Tth101       | 5.97 | 1.48 | -5.27       | -5.24     | -2.59       | -2.15     | 7    |
| apv-EC       | 6.32 | 1.04 | -5.28       | -5.38     | -           | -         | 8    |
| TPBC         | 6.13 | 1.20 | -5.33       | -5.35     | -2.39       | -2.04     | 9    |
| TPBS         | 6.16 | 1.22 | -5.3        | -5.35     | -2.45       | -2.12     | 9    |

**Table S2** Calculated HOMO, LUMO, IP and EA together with experimental values for designed HTMs.

|     | HOMO<br>(th.) <sup>a</sup> | HOMO<br>(exp.) <sup>b</sup> | HOMO<br>(meas.) <sup>c</sup> | LUMO<br>(th.) <sup>a</sup> | LUMO<br>(exp.) <sup>d</sup> | LUMO<br>(meas.) <sup>e</sup> | IP <sup>a</sup> | HOMO<br>(exp.) <sup>f</sup> | EA <sup>a</sup> | LUMO<br>(exp.) <sup>g</sup> |
|-----|----------------------------|-----------------------------|------------------------------|----------------------------|-----------------------------|------------------------------|-----------------|-----------------------------|-----------------|-----------------------------|
| H01 | -5.31                      | -5.25                       |                              | -2.16                      | -2.56                       |                              | 6.03            | -5.25                       | 1.51            | -2.64                       |
| H02 | -5.31                      | -5.25                       |                              | -2.24                      | -2.62                       |                              | 6.01            | -5.24                       | 1.58            | -2.69                       |
| H03 | -5.32                      | -5.26                       |                              | -2.34                      | -2.68                       |                              | 6.00            | -5.24                       | 1.67            | -2.76                       |
| H04 | -5.35                      | -5.28                       |                              | -2.45                      | -2.76                       |                              | 6.01            | -5.24                       | 1.80            | -2.85                       |
| Z26 | -5.05                      | -5.08                       | 5.16 <sup>h</sup>            | -2.35                      | -2.69                       | -2.77 <sup>h</sup>           | 5.77            | -5.13                       | 1.64            | -2.74                       |
| FDT | -5.09                      | -5.11                       | 5.16 <sup>i</sup>            | -1.75                      | -2.28                       | -2.28 <sup>i</sup>           | 5.95            | -5.22                       | 0.79            | -2.12                       |

<sup>a</sup>from the B3P86/6-311G(d,p) calculations; <sup>b</sup>from  $HOMO(exp.)=0.66HOMO(cal.)-1.75$ ; <sup>c</sup>from cyclic voltammogram measure;  
<sup>d</sup> from  $LUMO(exp.)=0.69LUMO(th.)-1.07$ ; <sup>e</sup> from  $HOMO(exp.)=-0.46IP-2.48$ ; <sup>f</sup> from  $LUMO(exp.)=-0.73EA-1.54$ ; <sup>h</sup>from ref.12; <sup>i</sup>from ref.28.

**Table S3** Adiabatic ionization potential ( $IP_a$  in eV), electron affinities ( $EA_a$  in eV), absolute hardness ( $\eta$  in eV), exciton binding energy ( $E_b$  in eV), and solvation free energy ( $\Delta G$  in eV) of molecules Z26.

|     | $IP_a$ | $EA_a$ | $\eta$ | $\Delta G$ |
|-----|--------|--------|--------|------------|
| Z26 | 5.77   | 1.64   | 2.06   | -0.54      |

**Table S4** Predicted crystal data of investigated molecules.

| Molecules | Space group | $\rho$ | $a(\text{\AA})$ | $b(\text{\AA})$ | $c(\text{\AA})$ | $\alpha$ | $\beta$ | $\gamma$ |
|-----------|-------------|--------|-----------------|-----------------|-----------------|----------|---------|----------|
| H01       | P1          | 1.02   | 15.38           | 8.84            | 19.85           | 91.50    | 81.35   | 75.11    |
| H02       | P1          | 1.02   | 19.25           | 31.84           | 4.78            | 85.54    | 82.83   | 71.44    |
| H03       | Pna21       | 1.08   | 31.27           | 8.92            | 19.97           | 90.00    | 90.00   | 90.00    |
| H04       | P212121     | 1.14   | 27.59           | 13.10           | 15.37           | 90.00    | 90.00   | 90.00    |

#### References:

1. F. Zhang, Z. Wang, H. Zhu, N. Pellet, J. Luo, C. Yi, X. Liu, H. Liu, S. Wang, X. Li, Y. Xiao, S. M. Zakeeruddin, D. Bi and M. Grätzel, *Nano Energy*, 2017, **41**, 469-475.
2. M. Aonuma, T. Oyamada, H. Sasabe, T. Miki and C. Adachi, *Applied Physics Letters*, 2007, **90**, 183503.
3. A. Molina-Ontoria, I. Zimmermann, I. Garcia-Benito, P. Gratia, C. Roldán-Carmona, S. Aghazada, M. Graetzel, M. K. Nazeeruddin and N. Martín, *Angewandte Chemie International Edition*, 2016, **55**, 6270-6274.
4. X. Liu, F. Kong, S. Jin, W. Chen, T. Yu, T. Hayat, A. Alsaedi, H. Wang, Z. a. Tan, J. Chen and S. Dai, *ACS Applied Materials & Interfaces*, 2017, **9**, 27657-27663.
5. M. Saliba, S. Orlandi, T. Matsui, S. Aghazada, M. Cavazzini, J.-P. Correa-Baena, P. Gao, R. Scopelliti, E. Mosconi, K.-H. Dahmen, F. De Angelis, A. Abate, A. Hagfeldt, G. Pozzi, M. Graetzel and M. K. Nazeeruddin, *Nature Energy*, 2016, **1**, 15017.
6. D. Bi, B. Xu, P. Gao, L. Sun, M. Grätzel and A. Hagfeldt, *Nano Energy*, 2016, **23**, 138-144.
7. X. Liu, F. Kong, F. Guo, T. Cheng, W. Chen, T. Yu, J. Chen, Z. a. Tan and S. Dai, *Dyes and Pigments*, 2017, **139**, 129-135.
8. S. T. Lv, Y. K. Song, J. Y. Xiao, L. F. Zhu, J. J. Shi, H. Y. Wei, Y. Z. Xu, J. Dong, X. Xu, S. R. Wang, Y. Xiao, Y. H. Luo, D. M. Li, X. G. Li and Q. B. Meng, *Electrochim Acta*, 2015, **182**, 733-741.
9. Y. Song, S. Lv, X. Liu, X. Li, S. Wang, H. Wei, D. Li, Y. Xiao and Q. Meng, *Chem. Commun.*, 2014, **50**, 15239-15242.
